# Supplementary material for: Islet Product Characteristics and Factors Related to Successful Human Islet Transplantation From the Collaborative Islet Transplant Registry (CITR) 1999–2010
Source: PubMed Central journal article supplement — Am J Transplant. 2014 Oct 2;14(11):2595–606. doi: 10.1111/ajt.12872 (PMC4282081; doi:10.1111/ajt.12872), 2014-10-02
Supplement: ajt0014-2595-SD1.pdf [file ajt0014-2595-SD1.pdf]

Table S1. Donor characteristics

|                                           | Continent                |                       |                | Type of transplantation |                    |                |
|-------------------------------------------|--------------------------|-----------------------|----------------|-------------------------|--------------------|----------------|
|                                           | North America<br>(n=697) | JDRF Sites<br>(n=320) | <i>p</i> value | ITA<br>(n= 856)         | IAK/SIK<br>(n=161) | <i>p</i> value |
| <b>Age (yrs)</b>                          | 42.7 ± 11.9              | 45.4 ± 13.3           |                | 42.9 ± 12               | 44.9 ± 13.4        |                |
| <b>Donor Gender —% (n)</b>                |                          |                       |                |                         |                    |                |
| Female donor only                         | 37.4 (n=261)             | 36.9 (n=118)          |                | 36.9 (n=316)            | 39.1 (n=63)        |                |
| Mixed-gender multiple-donor infusion      | 3.6 (n=25)               | 4.1 (n=13)            |                | 3.3 (n=28)              | 6.2 (n=10)         |                |
| Male donor only                           | 59 (n=411)               | 59.1 (n=189)          |                | 59.8 (n=512)            | 54.7 (n=88)        |                |
| <b>Body weight (kg)</b>                   | 91.2 ± 21.6              | 79.3 ± 14.6           | <0.001         | 88.3 ± 20.3             | 83.9 ± 21.1        | <0.05          |
| <b>Height (cm)</b>                        | 173.8 ± 10.1             | 172.5 ± 9             |                | 173.5 ± 10              | 172.7 ± 8.5        |                |
| <b>BMI (kg/m<sup>2</sup>)</b>             | 30.2 ± 6.6               | 26.7 ± 4.8            | <0.001         | 29.3 ± 6.2              | 28.1 ± 6.8         | <0.05          |
| <b>Ethnicity —% (n)</b>                   |                          |                       |                |                         |                    |                |
| Non-hispanic                              | 88.4 (n=410)             | 100 (n=128)           |                | 91.1 (n=469)            | 89.6 (n=69)        |                |
| Mixed-ethnicity multiple-donor infusion   | 2.4 (n=11)               | -                     |                | 1.6 (n=8)               | 3.9 (n=3)          |                |
| Hispanic                                  | 9.3 (n=43)               | -                     |                | 7.4 (n=38)              | 6.5 (n=5)          |                |
| <b>Donor race —% (n)</b>                  |                          |                       |                |                         |                    |                |
| White                                     | 87.6 (n=436)             | 98.5 (n=128)          |                | 89.3 (n=494)            | 93.3 (n=70)        |                |
| <b>Cause of death —% (n)</b>              |                          |                       |                |                         |                    | <0.05          |
| Trauma                                    | 34.5 (n=223)             | 30.4 (n=85)           |                | 34.1 (n=268)            | 28.6 (n=40)        |                |
| Cerebrovascular/stroke                    | 56.6 (n=366)             | 62.5 (n=175)          |                | 56.8 (n=447)            | 67.1 (n=94)        |                |
| <b>History —% (n)</b>                     |                          |                       |                |                         |                    |                |
| Hypertension                              | 36.7 (n=224)             | 31.3 (n=70)           |                | 35.8 (n=256)            | 31.7 (n=38)        |                |
| Alcohol use                               | 21.5 (n=119)             | 11.4 (n=26)           |                | 18.3 (n=121)            | 20.3 (n=24)        |                |
| <b>Laboratory results</b>                 |                          |                       |                |                         |                    |                |
| Creatinine (mg/dl)                        | 1.1 ± 0.6                | 1.1 ± 0.7             |                | 1.1 ± 0.7               | 1 ± 0.4            |                |
| BUN (mg/dl)                               | 15.4 ± 8.8               | 14.9 ± 8.9            |                | 15.3 ± 8.9              | 15.1 ± 8.7         |                |
| Bilirubin (mg/dl)                         | 0.9 ± 0.7                | 0.8 ± 0.6             |                | 0.9 ± 0.7               | 0.8 ± 0.6          |                |
| AST (U/L)                                 | 74.7 ± 218.3             | 80.9 ± 162.8          |                | 73.7 ± 198.6            | 88.9 ± 215.9       |                |
| ALT (U/L)                                 | 62.7 ± 173.6             | 65.1 ± 143.4          |                | 61.6 ± 165              | 71.8 ± 166.1       |                |
| Lipase (U/L)                              | 1.2 ± 2.1                | 0.7 ± 0.8             |                | 1.1 ± 2                 | 1.1 ± 1.5          |                |
| Amylase (U/L)                             | 2.9 ± 5.8                | 2 ± 2.9               |                | 2.7 ± 5.4               | 2.3 ± 3.6          |                |
| Pre-insulin glucose (mg/dl)               | 124.2 ± 37.5             | 130.8 ± 40.5          |                | 125.4 ± 38.2            | 126.5 ± 38.4       |                |
| Maximum blood glucose (mg/dl)             | 240.5 ± 84.7             | 201.1 ± 72.4          | <0.001         | 228.4 ± 82.5            | 243.4 ± 88.5       |                |
| Max-Min donor glucose (mg/dl)             | 119.3 ± 86.6             | 74.6 ± 73.2           |                | 109.5 ± 85.6            | 117.2 ± 88         |                |
| HbA1c (%)                                 | 5.5 ± 0.5                | 5.5 ± 0.4             |                | 5.5 ± 0.5               | 5.3 ± 0.4          | <0.05          |
| <b>Treatment at last admission —% (n)</b> |                          |                       |                |                         |                    |                |
| Vasopressors                              | 97.2 (n=581)             | 95.5 (n=235)          |                | 96.4 (n=695)            | 98.4 (n=121)       |                |
| Steroids                                  | 70.6 (n=279)             | 23.3 (n=30)           | <0.05          | 61 (n=268)              | 48.2 (n=41)        | <0.05          |
| Insulin                                   | 48.2 (n=284)             | 22.4 (n=37)           | <0.05          | 44.5 (n=291)            | 30 (n=30)          | <0.01          |
| Transfusion pre-recovery                  | 35.3 (n=198)             | 25.6 (n=46)           |                | 33.6 (n=211)            | 29.2 (n=33)        |                |
| Transfusion intra-operatively             | 6.4 (n=32)               | 6.7 (n=9)             |                | 6.3 (n=34)              | 7.5 (n=7)          |                |

Table S2. Pancreas preservation and recovery

|                                                      | Continent                |                       |                | Type of transplantation |                    |                |
|------------------------------------------------------|--------------------------|-----------------------|----------------|-------------------------|--------------------|----------------|
|                                                      | North America<br>(n=697) | JDRF Sites<br>(n=320) | <i>p</i> value | ITA<br>(n= 856)         | IAK/SIK<br>(n=161) | <i>p</i> value |
| <b>Procurement/transplant centers related —% (n)</b> | 56.9 (n=340)             | 70.8 (n=211)          | <0.001         | 60.3 (n=444)            | 66.9 (n=107)       |                |
| <b>Pancreas Preservation —% (n)</b>                  |                          |                       | <0.001         |                         |                    |                |
| UW only                                              | 45.6 (n=318)             | 35 (n=112)            |                | 41 (n=351)              | 49.1 (n=79)        |                |
| TLM only                                             | 23 (n=160)               | 14.7 (n=47)           |                | 21.4 (n=183)            | 14.9 (n=24)        |                |
| HTK only                                             | 10.2 (n=71)              | -                     |                | 8.3 (n=71)              | -                  |                |
| Celsior                                              | -                        | 7.2 (n=23)            |                | 1.9 (n=16)              | 4.3 (n=7)          |                |
| UW+TLM                                               | 4.2 (n=29)               | 3.1 (n=10)            |                | 4.1 (n=35)              | 2.5 (n=4)          |                |
| Combinations/Other                                   | 2.7 (n=19)               | 9.4 (n=30)            |                | 4.7 (n=40)              | 5.6 (n=9)          |                |
| Missing/Unknown                                      | 14.3 (n=100)             | 30.6 (n=98)           |                | 18.7 (n=160)            | 23.6 (n=38)        |                |
| <b>Time (hours)</b>                                  |                          |                       |                |                         |                    |                |
| Admission to brain death                             | 49.6 ± 63.5              | 52.8 ± 52             |                | 49.8 ± 63.1             | 53 ± 50.9          |                |
| Death to cross-clamp                                 | 20.4 ± 8.3               | 13.1 ± 5.5            | <0.001         | 18.9 ± 8.2              | 15.7 ± 8.7         | <0.001         |
| Cross clamp to pancreas recovery                     | 0.7 ± 1.3                | 1 ± 0.5               | <0.01          | 0.8 ± 1.2               | 0.9 ± 0.4          |                |
| Death to pancreas recovery                           | 21.2 ± 8.8               | 13.7 ± 5.5            | <0.01          | 19.3 ± 8.4              | 16.3 ± 9.1         | <0.05          |
| Cold ischemia time                                   | 7.5 ± 3.5                | 8.1 ± 10.3            |                | 7.7 ± 5.3               | 7.3 ± 9.3          |                |
| Recovery to transplant                               | 33.8 ± 20.6              | 33 ± 20.4             |                | 33.6 ± 20.3             | 33.2 ± 21.7        |                |
| Death to transplant                                  | 55.1 ± 23.5              | 47.2 ± 23.1           | <0.001         | 53 ± 23                 | 52.4 ± 26.8        |                |

Table S3. Islet processing

|                                          | Continent                |                       |                | Type of transplantation |                    |                |
|------------------------------------------|--------------------------|-----------------------|----------------|-------------------------|--------------------|----------------|
|                                          | North America<br>(n=697) | JDRF Sites<br>(n=320) | <i>p</i> value | ITA<br>(n= 856)         | IAK/SIK<br>(n=161) | <i>p</i> value |
| <b>Digestion Enzyme —% (n)</b>           |                          |                       | <0.001         |                         |                    | <0.001         |
| Collagenase                              |                          |                       |                |                         |                    |                |
| Liberase HI alone                        | 61.5 (n=429)             | 49.7 (n=159)          |                | 57.6 (n=493)            | 59 (n=95)          |                |
| Serva NB1 alone                          | 6.5 (n=45)               | 15.6 (n=50)           |                | 8.9 (n=76)              | 11.8 (n=19)        |                |
| ServaGMPColl+ServaNeutProtease           | 4.7 (n=33)               | 4.7# (n=15)           |                | 5.6 (n=48)              | -                  |                |
| CollagenaseP alone                       | 0.1 (n=1)                | 4.4 (n=14)            |                | 1.6 (n=14)              | 0.6 (n=1)          |                |
| Liberase MTF                             | 0.3 (n=2)                | 0.3 (n=1)             |                | 0.4 (n=3)               | -                  |                |
| Liberase-collagenase blend               | 6.9 (n=48)               | -                     |                | 5.6 (n=48)              | -                  |                |
| Other/other combination                  | 5.7 (n=40)               | 6.3 (n=20)            |                | 5.1 (n=44)              | 9.9 (n=16)         |                |
| Not yet reported                         | 14.2 (n=99)              | 19.1 (n=61)           |                | 15.2 (n=130)            | 18.6 (n=30)        |                |
| Thermolysin (in addition to other )      | 10.3 (n=62)              | 0.4 (n=1)             | <0.001         | 7.6 (n=55)              | 6 (n=8)            |                |
| Pulmozyme (in addition to other)         | 46.1 (n=277)             | 43.7 (n=114)          |                | 46.4 (n=338)            | 9.6 (n=53)         |                |
| <b>Purification Gradient Type —% (n)</b> |                          |                       |                |                         |                    | <0.01          |
| Discontinuous                            | 4.9 (n=28)               | 7.8 (n=21)            |                | 4.8 (n=34)              | 11.2 (n=15)        |                |
| Continuous                               | 84.8 (n=485)             | 81.7 (n=219)          |                | 84 (n=593)              | 82.8 (n=111)       |                |
| Both                                     | 10.1 (n=58)              | 10.4 (n=28)           |                | 11 (n=78)               | 6 (n=8)            |                |
| <b>Islet Culture (hours)</b>             |                          |                       |                |                         |                    |                |
| Culture time (0-max)                     | 18.2 ± 19.2              | 16.2 ± 16.1           |                | 17.6 ± 18.3             | 18.5 ± 19.5        |                |
| Islets cultured >=6 hrs —% (n)           | 24.5 (n=171)             | 30.6(n=98)            | <0.001         | 27 (n=231)              | 23.6 (n=38)        |                |

Table S4. Islet product characteristics

|                                                           | Continent                |                       |                | Type of transplantation |                    |                |
|-----------------------------------------------------------|--------------------------|-----------------------|----------------|-------------------------|--------------------|----------------|
|                                                           | North America<br>(n=697) | JDRF Sites<br>(n=320) | <i>p</i> value | ITA<br>(n= 856)         | IAK/SIK<br>(n=161) | <i>p</i> value |
| <b>Islet Mass</b>                                         |                          |                       |                |                         |                    |                |
| Total IEQs ( x10 <sup>3</sup> ) at time of particle count | 446.9 ± 162.7            | 360.1 ± 128.2         | <0.001         | 421.5 ± 153.4           | 383.8 ± 173.3      | <0.05          |
| IEQ/islet particle ratio                                  | 1.2 ± 0.5                | 1 ± 0.6               | <0.001         | 1.2 ± 0.6               | 1 ± 0.4            |                |
| IEQs infused ( x10 <sup>3</sup> )                         | 456.2 ± 161.5            | 361.8 ± 125           | <0.001         | 432.3 ± 159.2           | 395.8 ± 142.5      | <0.05          |
| Packed Cell Volume Infused (mL)                           | 3.9 ± 2.3                | 3.9 ± 2.1             |                | 3.9 ± 2.2               | 4.4 ± 2.6          | <0.05          |
| <b>Islet Quality</b>                                      |                          |                       |                |                         |                    |                |
| Purity (%)                                                | 65.9 ± 16.5              | 53.4 ± 19.1           | <0.001         | 62.6 ± 18               | 58 ± 19.4          | <0.01          |
| Embedded islets (%)                                       | 15.5 ± 18.7              | 16.3 ± 18.8           |                | 15.7 ± 19               | 15.4 ± 15.3        | <0.01          |
| Stimulation Index                                         | 3.5 ± 3.5                | 2.6 ± 2.8             | <0.01          | 3.4 ± 3.5               | 2.4 ± 1.8          |                |
| Islet viability (%)                                       | 91.2 ± 6.5               | 91 ± 5                |                | 91 ± 6.3                | 92 ± 5.2           |                |
| Total Donor Beta Cells ( x10 <sup>6</sup> )               | 239.5 ± 199.7            | 173.3 ± 106.3         |                | 228.3 ± 192.7           | 273.8 ± 172.9      |                |
| Total Donor Beta Cells ( x10 <sup>6</sup> ) /kg recipient | 3.6 ± 3.1                | 3 ± 2.2               |                | 3.5 ± 3                 | 5 ± 3.4            |                |
| Total insulin content of islets (mg)                      | 3.2 ± 2.1                | 4.3 ± 2.6             | <0.05          | 3.5 ± 2.3               | 3 ± 1.9            |                |
| Total endotoxin infused (EU)                              | 29 ± 61.4                | 2.7 ± 11.9 ***        |                | 23 ± 57                 | 20.3 ± 40.5        |                |
| Total endotoxin (EU) /kg recipient                        | 0.4 ± 0.9                | 0 ± 0.1 ***           |                | 0.4 ± 0.8               | 0.3 ± 0.7          |                |

Table S5. Islet infusion

|                                             | Continent                |                       |                | Type of transplantation |                    |                |
|---------------------------------------------|--------------------------|-----------------------|----------------|-------------------------|--------------------|----------------|
|                                             | North America<br>(n=697) | JDRF Sites<br>(n=320) | <i>p</i> value | ITA<br>(n= 856)         | IAK/SIK<br>(n=161) | <i>p</i> value |
| <b>Recipient infusion sequence # —% (n)</b> |                          |                       | <0.05          |                         |                    |                |
| 1 <sup>st</sup>                             | 54.7 (n=381)             | 48.8 (n=156)          |                | 53 (n= 454)             | 51.6 (n=83)        |                |
| 2 <sup>nd</sup>                             | 35.9 (n=250)             | 37.5 (n=120)          |                | 36.2 (n=310 )           | 37.3 (n=60)        |                |
| 3 <sup>rd</sup>                             | 8.9 (n=62)               | 11.9 (n=38)           |                | 9.9 (n=85)              | 9.3 (n=15)         |                |
| 4th -6th                                    | 0.6 (n=4)                | 1.9 (n=6)             |                | 0.8 (n=6)               | 1.9 (n=3)          |                |
| <b>Total donors/infusion —% (n)</b>         |                          |                       | <0.05          |                         |                    |                |
| 1                                           | 92 (n=641)               | 86.3 (n=276)          |                | 90.7 (n=776)            | 87.6 (n= 141)      |                |
| 2                                           | 7.5 (n=52)               | 13.4 (n=43)           |                | 9 (n=77)                | 11.2 (n=18)        |                |
| 3                                           | 0.6 (n=4)                | 0.3 (n=1)             |                | 0.4 (n=3)               | 1.2 (n=2)          |                |
| <b>Any positive crossmatch —% (n)</b>       | 4.8 (n=18)               | 0.8 (n=2)             |                | 3.5 (n=18)              | 1.6 (n=2)          |                |

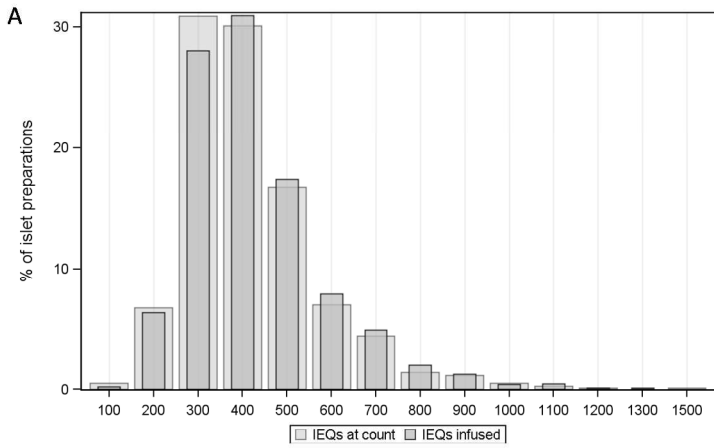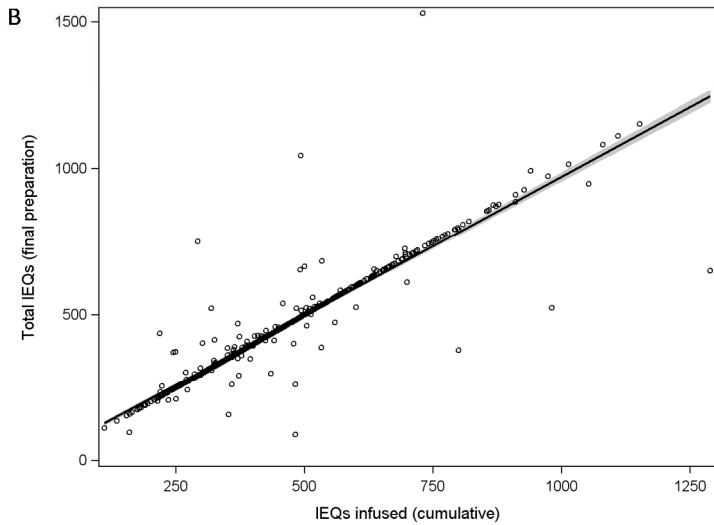

Figure S1. Distribution of islet yields processed and infused. Percent distribution of total islet yield (A) and the correlation between those at count and infusion (B) are shown. Data are based on 1,017 clinical products in NIDDK-sponsored North American and JDRF European and Australian CITR sites participating in the Collaborative Islet Transplant Registry, 1999-2010. Linear regression ( $r=0.93$ ,  $p<0.0001$ ) is shown (B).
